# Supplementary material for: Dissociative adsorption modes of TATB on the Al (111) surface: a DFT investigation
Source: Royal Society of Chemistry journal article supplement (doi:10.1039/c9ra00989b), 2019-01-01

## Dissociative adsorption modes of TATB on Al (111) surface:

### A DFT investigation

Guo-zheng Zhao,\*<sup>a</sup> Hui-li Li,<sup>a</sup> Jian-feng Jia,<sup>a</sup> Hai-shun Wu<sup>a</sup> and Ming Lu<sup>b</sup>

<sup>a</sup> Key Laboratory of Magnetic Molecules, Magnetic Information Materials Ministry of Education, The School of Chemistry and Material Science, Shanxi Normal University, Linfen 041004, PR China;

<sup>b</sup> School of Chemical Engineering, Nanjing University of Science and Technology, Nanjing 210094, China

1. The lattice parameters and coordinates of the Al (111) surface.

&CELL

ABC 14.3437 14.3437 22.0269

ALPHA\_BETA\_GAMMA 90.0 90.0 60.0

PERIODIC XYZ

&END CELL

&COORD

|    |               |               |              |
|----|---------------|---------------|--------------|
| Al | 5.7356821863  | 11.5948221664 | 2.3435609202 |
| Al | 5.7355326716  | 9.9386948660  | 0.0011546057 |
| Al | 8.6037072221  | 11.5953796210 | 2.3438495005 |
| Al | 8.6049719209  | 9.9392525955  | 0.0014433282 |
| Al | 11.4731464714 | 11.5959373505 | 2.3441382231 |
| Al | 11.4729969567 | 9.9398100501  | 0.0017319085 |
| Al | 14.3411715072 | 11.5964948051 | 2.3444268033 |
| Al | 14.3424362060 | 9.9403677796  | 0.0020206311 |
| Al | 17.2106107565 | 11.5970525346 | 2.3447155259 |
| Al | 17.2104612418 | 9.9409252342  | 0.0023092113 |
| Al | 4.3014455840  | 9.1095360088  | 2.3432721977 |
| Al | 4.3020030386  | 7.4538170606  | 0.0014433282 |
| Al | 7.1701775892  | 9.1105018155  | 2.3441382231 |
| Al | 7.1707353186  | 7.4539664379  | 0.0011546057 |
| Al | 10.0389098692 | 9.1106511928  | 2.3438495005 |

|    |               |              |              |
|----|---------------|--------------|--------------|
| Al | 10.0394673238 | 7.4549322446 | 0.0020206311 |
| Al | 12.9076418743 | 9.1116169996 | 2.3447155259 |
| Al | 12.9081996038 | 7.4550816219 | 0.0017319085 |
| Al | 15.7763741543 | 9.1117663769 | 2.3444268033 |
| Al | 15.7769316089 | 7.4560474287 | 0.0025979339 |
| Al | 2.8679158505  | 6.6254747334 | 2.3429836174 |
| Al | 2.8677663358  | 4.9693474330 | 0.0005773028 |
| Al | 5.7359408863  | 6.6260321880 | 2.3432721977 |
| Al | 5.7372055851  | 4.9699051625 | 0.0008660254 |
| Al | 8.6053801356  | 6.6265899175 | 2.3435609202 |
| Al | 8.6052306209  | 4.9704626171 | 0.0011546057 |
| Al | 11.4734051714 | 6.6271473721 | 2.3438495005 |
| Al | 11.4746698702 | 4.9710203466 | 0.0014433282 |
| Al | 14.3428444208 | 6.6277051015 | 2.3441382231 |
| Al | 14.3426949060 | 4.9715778012 | 0.0017319085 |
| Al | 1.4336792483  | 4.1401885757 | 2.3426948948 |
| Al | 1.4342367029  | 2.4844696275 | 0.0008660254 |
| Al | 4.3024112534  | 4.1411543825 | 2.3435609202 |
| Al | 4.3029689829  | 2.4846190048 | 0.0005773028 |
| Al | 7.1711435334  | 4.1413037598 | 2.3432721977 |
| Al | 7.1717009880  | 2.4855848116 | 0.0014433282 |
| Al | 10.0398755385 | 4.1422695666 | 2.3441382231 |
| Al | 10.0404332680 | 2.4857341889 | 0.0011546057 |
| Al | 12.9086078185 | 4.1424189439 | 2.3438495005 |
| Al | 12.9091652731 | 2.4866999957 | 0.0020206311 |
| Al | 0.0001495147  | 1.6561273004 | 2.3424063146 |
| Al | 0.0000000000  | 0.0000000000 | 0.0000000000 |
| Al | 2.8688815199  | 1.6570931071 | 2.3432723400 |
| Al | 2.8694392493  | 0.0005577295 | 0.0002887226 |
| Al | 5.7376137999  | 1.6572424845 | 2.3429836174 |

|    |               |               |              |
|----|---------------|---------------|--------------|
| Al | 5.7374642851  | 0.0011151841  | 0.0005773028 |
| Al | 8.6056388357  | 1.6577999390  | 2.3432721977 |
| Al | 8.6069035345  | 0.0016729135  | 0.0008660254 |
| Al | 11.4750780850 | 1.6583576685  | 2.3435609202 |
| Al | 11.4749285703 | 0.0022303681  | 0.0011546057 |
| Al | 7.1703973934  | 10.7666034893 | 4.5654585728 |
| Al | 5.7366820482  | 9.9387658989  | 6.9049178306 |
| Al | 10.0392768878 | 10.7671951047 | 4.5658076366 |
| Al | 8.6048613218  | 9.9391906796  | 6.9054911662 |
| Al | 12.9083751391 | 10.7671486734 | 4.5667295956 |
| Al | 11.4741295042 | 9.9391089983  | 6.9063119110 |
| Al | 15.7771389189 | 10.7671305321 | 4.5661389653 |
| Al | 14.3433584374 | 9.9387049730  | 6.9062774079 |
| Al | 18.6454439784 | 10.7670193462 | 4.5656021958 |
| Al | 17.2111913363 | 9.9392708898  | 6.9061190252 |
| Al | 5.7357130229  | 8.2819930928  | 4.5658983222 |
| Al | 4.3022812132  | 7.4539843979  | 6.9054934274 |
| Al | 8.6046955404  | 8.2823913571  | 4.5667322825 |
| Al | 7.1701123791  | 7.4541540137  | 6.9055889232 |
| Al | 11.4737396528 | 8.2826731883  | 4.5672082140 |
| Al | 10.0395201069 | 7.4541826218  | 6.9068650000 |
| Al | 14.3424213498 | 8.2823590726  | 4.5669285480 |
| Al | 12.9090041758 | 7.4538521788  | 6.9065313600 |
| Al | 17.2109367861 | 8.2824946168  | 4.5663989227 |
| Al | 15.7763615691 | 7.4541647485  | 6.9065733039 |
| Al | 4.3015947221  | 5.7977923796  | 4.5649842778 |
| Al | 2.8678623415  | 4.9704090964  | 6.9043383285 |
| Al | 7.1704927370  | 5.7983322042  | 4.5650764450 |
| Al | 5.7362480897  | 4.9708683076  | 6.9048979243 |
| Al | 10.0395495342 | 5.7984822083  | 4.5662051910 |

|    |               |              |              |
|----|---------------|--------------|--------------|
| Al | 8.6052283304  | 4.9706347652 | 6.9052911830 |
| Al | 12.9084106383 | 5.7982143991 | 4.5654607432 |
| Al | 11.4747643862 | 4.9704586711 | 6.9054678562 |
| Al | 15.7767749327 | 5.7983892528 | 4.5650723800 |
| Al | 14.3423710608 | 4.9708921428 | 6.9052527706 |
| Al | 2.8678490022  | 3.3136596801 | 4.5648458312 |
| Al | 1.4339251251  | 2.4861480211 | 6.9045113991 |
| Al | 5.7368698321  | 3.3140025304 | 4.5655747405 |
| Al | 4.3017503154  | 2.4863644145 | 6.9046673465 |
| Al | 8.6058554868  | 3.3141163809 | 4.5658718573 |
| Al | 7.1713162667  | 2.4864791156 | 6.9057277970 |
| Al | 11.4745992698 | 3.3139838252 | 4.5656732118 |
| Al | 10.0404751284 | 2.4860232626 | 6.9051175157 |
| Al | 14.3430440255 | 3.3139819409 | 4.5650573770 |
| Al | 12.9082638556 | 2.4864335236 | 6.9054096734 |
| Al | 1.4326992871  | 0.8294109992 | 4.5652929264 |
| Al | -0.0010559846 | 0.0010196330 | 6.9044259215 |
| Al | 4.3016977482  | 0.8298966851 | 4.5658024449 |
| Al | 2.8671477058  | 0.0014213025 | 6.9049485995 |
| Al | 7.1706674834  | 0.8300728987 | 4.5664187438 |
| Al | 5.7362491837  | 0.0012093662 | 6.9055345893 |
| Al | 10.0394009623 | 0.8298734254 | 4.5657267795 |
| Al | 8.6059129310  | 0.0010436741 | 6.9053894258 |
| Al | 12.9078863400 | 0.8299835200 | 4.5655298802 |
| Al | 11.4732410254 | 0.0013646939 | 6.9052889470 |

&END COORD

## 2. Computational details.

All of the calculations were conducted in the QuickStep module of CP2K software package on the basis of density functional theory (DFT) with the gradient corrected functional of a revised

Perdew-Burke-Ernzerhof (PBEsol). Quickstep is based on a mixed Gaussian and plane waves method (GPW), in which a dual basis of atom-centered Gaussian orbitals and plane waves can interpret the wave functions and the electronic density, respectively.

Table 1 The configurations for the CP2K calculations

| Parameter                                      | Value                                               |
|------------------------------------------------|-----------------------------------------------------|
| Method                                         | Mixed Gaussian and Plan-wave (GPW)                  |
| Functional                                     | PBEsol                                              |
| Dispersive interaction                         | DRSLL                                               |
| Pseudo-potential                               | Goedecker -Teter-Hutter (GTH)                       |
| Gaussian-type basis set sets                   | DZVP-MOLOPT-SR-GTH                                  |
| Plane-wave cut-off                             | 600 Ry                                              |
| $k$ -points sampling                           | Gamma-point only                                    |
| Electron density convergence criteria          | $1.0 \times 10^{-7}$ a.u.                           |
|                                                | Maximum force $4.5 \times 10^{-5}$ a.u.             |
| Convergence criteria for geometry optimization | RMS force $3.0 \times 10^{-5}$ a.u.                 |
|                                                | Maximum coordinate change $3.0 \times 10^{-4}$ a.u. |
|                                                | RMS coordinate change $1.5 \times 10^{-4}$ a.u.     |

In order to build the Al (111) surface, a  $4 \times 4 \times 4$  supercell of Al was optimized with lattice parameters  $a = b = c = 4.057 \text{ \AA}$ , which matches well with the reported values ( $a = b = c = 4.050 \text{ \AA}$ ) [1]. A  $5 \times 5$  slab was constructed on the basis of the optimized Al cell, which ensures that the distance between TATB and its period replica is larger than  $7 \text{ \AA}$ . Four Al layers were included and the vacuum region along  $c$  was larger than  $15 \text{ \AA}$ . In the following optimizing process, we fixed the lattice parameters of the supercell and froze the last two Al layers. Aimed at finding the most stable TATB/Al (111) configuration, many kinds of adsorption site were analyzed. Equation (1) shows the adsorption energy of TATB on Al (111) surface:

$$E_{\text{ads}} = E[\text{TATB/Al}] - E[\text{TATB}] - E[\text{Al}] \quad (1)$$

where, each term in Equations (1) is defined as follows:  $E[\text{TATB/Al}]$ , the total energy of TATB/Al (111) surface;  $E[\text{TATB}]$ , the energy of the isolated TATB molecule;  $E[\text{Al}]$ , the relaxed Al (111) surface without any adsorbed molecules. The counterpoise correction method [2] was used to correct the basis set errors.

## Reference

- [1] A. S. Cooper, Acta Cryst., 1962, 15: 578-582  
[2] S. F. Boys, F. Bernardi, Mol. Phys., 1970, 19: 553-566.

3. The structure and relative energies ( $E_{rel}$ , eV) of the considered TATB/Al (111).

| No.                                                                               | Structure                                                                           | $E_{rel}$ | No.  | Structure                                                                            | $E_{rel}$ |
|-----------------------------------------------------------------------------------|-------------------------------------------------------------------------------------|-----------|------|--------------------------------------------------------------------------------------|-----------|
| The center of the benzene ring above a bridge site between the second layer of Al |                                                                                     |           |      |                                                                                      |           |
| 1P                                                                                | 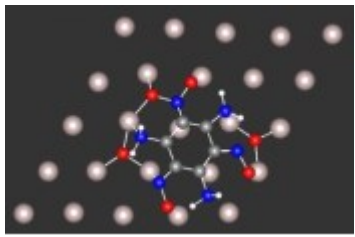   | 0.00      | 1P-1 |    | 5.45      |
| 1P-2                                                                              |    | 3.43      |      |                                                                                      |           |
| The center of the benzene ring above a bridge site between the third layer of Al  |                                                                                     |           |      |                                                                                      |           |
| 2P                                                                                |  | 0.00      | 2P-1 |  | 5.53      |
| 2P-2                                                                              |  | 4.14      |      |                                                                                      |           |
| The center of the benzene ring above an fcc site                                  |                                                                                     |           |      |                                                                                      |           |
| 3P                                                                                |  | 0.00      | 3P-1 |  | 7.53      |

|                                                                                  |                                                                                     |      |      |                                                                                      |       |
|----------------------------------------------------------------------------------|-------------------------------------------------------------------------------------|------|------|--------------------------------------------------------------------------------------|-------|
| 3P-2                                                                             | 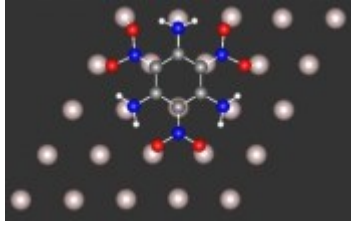   | 6.48 |      |                                                                                      |       |
| The center of the benzene ring above an on-top site                              |                                                                                     |      |      |                                                                                      |       |
| 4P                                                                               |    | 0.00 | 4P-1 |    | 10.86 |
| 4P-2                                                                             |   | 3.96 |      |                                                                                      |       |
| The center of the benzene ring above an hcp site                                 |                                                                                     |      |      |                                                                                      |       |
| 5P                                                                               |  | 0.00 | 5P-1 |  | 9.08  |
| 5P-2                                                                             |  | 7.28 |      |                                                                                      |       |
| The center of the benzene ring above a bridge site between the first layer of Al |                                                                                     |      |      |                                                                                      |       |
| 6P                                                                               |  | 0.00 | 6P-1 |  | 8.50  |

|                                                                                               |                                                                                     |      |      |                                                                                      |       |
|-----------------------------------------------------------------------------------------------|-------------------------------------------------------------------------------------|------|------|--------------------------------------------------------------------------------------|-------|
| 6P-2                                                                                          | 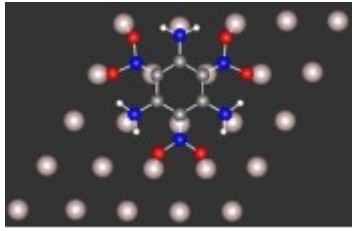   | 8.12 |      |                                                                                      |       |
| The C–C symmetric axis of the benzene ring above an on-top site                               |                                                                                     |      |      |                                                                                      |       |
| 1V                                                                                            |    | 0.00 | 1V-1 |    | 0.57  |
| 1V-2                                                                                          |   | 0.51 | 1V-3 |   | 8.62  |
| The C–C symmetric axis of the benzene ring above a bridge site between the second layer of Al |                                                                                     |      |      |                                                                                      |       |
| 2V                                                                                            |  | 0.00 | 2V-1 |  | 0.47  |
| 2V-2                                                                                          |  | 1.24 | 2V-3 |  | 0.29  |
| 2V-4                                                                                          |  | 0.89 | 2V-5 |  | 10.88 |
| The C–C symmetric axis of the benzene ring above an fcc site                                  |                                                                                     |      |      |                                                                                      |       |



|                                                                                              |                                                                                     |      |      |                                                                                      |      |
|----------------------------------------------------------------------------------------------|-------------------------------------------------------------------------------------|------|------|--------------------------------------------------------------------------------------|------|
| 3V                                                                                           | 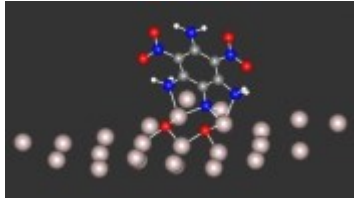   | 0.00 | 3V-1 |    | 0.71 |
| 3V-2                                                                                         |    | 7.77 | 3V-3 |    | 7.41 |
| The C–C symmetric axis of the benzene ring above an hcp site                                 |                                                                                     |      |      |                                                                                      |      |
| 4V                                                                                           |   | 0.00 | 4V-1 |   | 0.71 |
| 4V-2                                                                                         |  | 2.38 | 4V-3 |  | 5.98 |
| The C–C symmetric axis of the benzene ring above a bridge site between the third layer of Al |                                                                                     |      |      |                                                                                      |      |
| 5V                                                                                           |  | 0.00 | 5V-1 |  | 1.07 |
| 5V-2                                                                                         |  | 0.52 | 5V-3 |  | 2.45 |

|                                                                                              |                                                                                     |      |      |                                                                                      |      |
|----------------------------------------------------------------------------------------------|-------------------------------------------------------------------------------------|------|------|--------------------------------------------------------------------------------------|------|
| 5V-4                                                                                         | 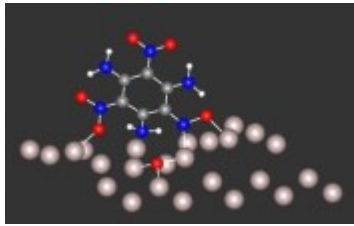   | 5.17 | 5V-5 |    | 5.64 |
| The C–C symmetric axis of the benzene ring above a bridge site between the first layer of Al |                                                                                     |      |      |                                                                                      |      |
| 6V                                                                                           |    | 0.00 | 6V-1 |    | 1.28 |
| 6V-2                                                                                         |   | 1.98 | 6V-3 |   | 2.68 |
| 6V-4                                                                                         |  | 9.00 | 6V-5 |  | 8.91 |

#### 4. The bond lengths (Å) of the considered TATB/Al (111).

| Geometries | P     | 1P    | 2P    | 3P    | 4P    | 5P    | 6P    |
|------------|-------|-------|-------|-------|-------|-------|-------|
| C1-N1      | 1.414 | 1.325 | 1.447 | 1.324 | 1.374 | 1.323 | 1.365 |
| C2-N2      | 1.327 | 1.425 | 1.43  | 1.413 | 1.448 | 1.484 | 1.443 |
| C3-N3      | 1.414 | 1.444 | 1.327 | 1.333 | 1.375 | 1.348 | 1.368 |
| C4-N4      | 1.327 | 1.488 | 1.461 | 1.486 | 1.448 | 1.414 | 1.453 |
| C5-N5      | 1.415 | 1.362 | 1.379 | 1.338 | 1.374 | 1.399 | 1.362 |
| C6-N6      | 1.327 | 1.463 | 1.463 | 1.379 | 1.450 | 1.369 | 1.485 |
| N2-H21     | 1.043 | 1.051 | 1.034 | 1.033 | 1.041 | 1.049 | 1.045 |
| N2-H22     | 1.043 | 1.032 | 1.048 | 1.036 | 1.036 | 1.041 | 1.040 |

|        |       |       |       |       |       |       |       |
|--------|-------|-------|-------|-------|-------|-------|-------|
| N4-H41 | 1.042 | 1.039 | 1.036 | 1.040 | 1.036 | 1.034 | 1.049 |
| N4-H42 | 1.042 | 1.035 | 1.065 | 1.053 | 1.041 | 2.124 | 1.036 |
| N6-H61 | 1.042 | 1.034 | 1.044 | 1.033 | 1.036 | 1.033 | 1.039 |
| N6-H62 | 1.042 | 1.046 | 1.040 | 1.030 | 1.041 | 1.032 | 1.034 |

---

| Geometries | V     | 1V    | 2V    | 3V    | 4V    | 5V    | 6V    |
|------------|-------|-------|-------|-------|-------|-------|-------|
| C1-N1      | 1.416 | 1.408 | 1.386 | 1.410 | 1.414 | 1.411 | 1.407 |
| C2-N2      | 1.328 | 1.436 | 1.414 | 1.428 | 1.422 | 1.419 | 1.437 |
| C3-N3      | 1.415 | 1.413 | 1.376 | 1.414 | 1.415 | 1.412 | 1.352 |
| C4-N4      | 1.329 | 1.333 | 1.335 | 1.332 | 1.333 | 1.332 | 1.346 |
| C5-N5      | 1.415 | 1.409 | 1.415 | 1.414 | 1.417 | 1.408 | 1.415 |
| C6-N6      | 1.328 | 1.426 | 1.337 | 1.431 | 1.423 | 1.420 | 1.442 |
| N2-H21     | 1.043 | 1.041 | 1.053 | 1.053 | 1.046 | 1.056 | 1.035 |
| N2-H22     | 1.043 | 1.069 | 1.047 | 1.051 | 1.066 | 1.065 | 1.068 |
| N4-H41     | 1.043 | 1.039 | 1.038 | 1.040 | 1.039 | 1.039 | 1.033 |
| N4-H42     | 1.043 | 1.041 | 1.037 | 1.039 | 1.038 | 1.039 | 1.040 |
| N6-H61     | 1.043 | 1.056 | 1.033 | 1.061 | 1.062 | 1.062 | 1.032 |
| N6-H62     | 1.043 | 1.075 | 1.031 | 1.053 | 1.049 | 1.051 | 1.069 |

5. Optimized adsorption configurations of TATB/Al (111) marked by bond lengths (unit: Å): 1P, 2P, 3P, 4P, 5P, and 6P denote the center of the benzene ring above a bridge site between the second layer of Al, a bridge site between the third layer of Al, an fcc site, an on-top site, an hcp site, and a bridge site between the first layer of Al, respectively. 1V, 2V, 3V, 4V, 5V, and 6V denote the C–C symmetric axis of the benzene ring above an on-top site, a bridge site between the second layer of Al, an fcc site, an hcp site, a bridge site between the third layer of Al, and the first layer of Al, respectively.

1P

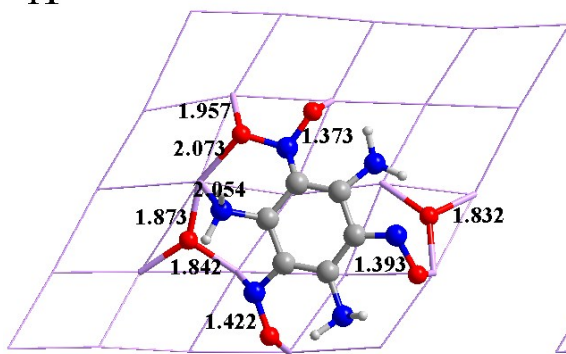

2P

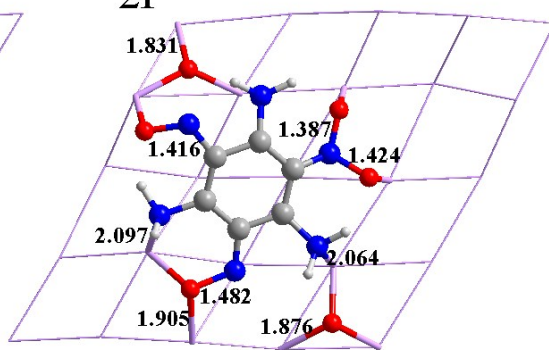

3P

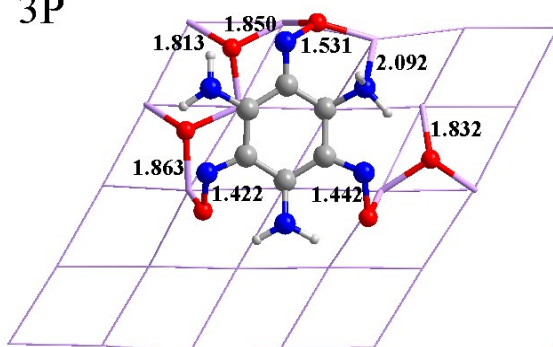

4P

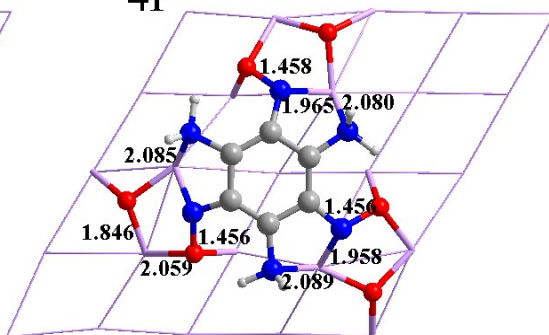

5P

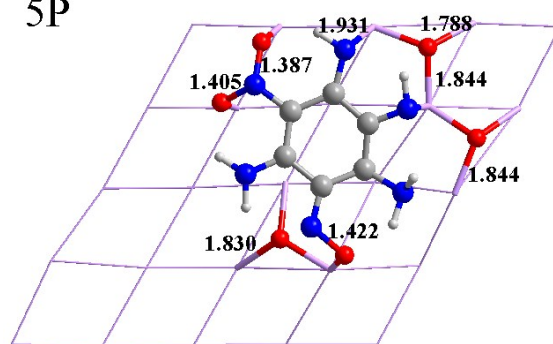

6P

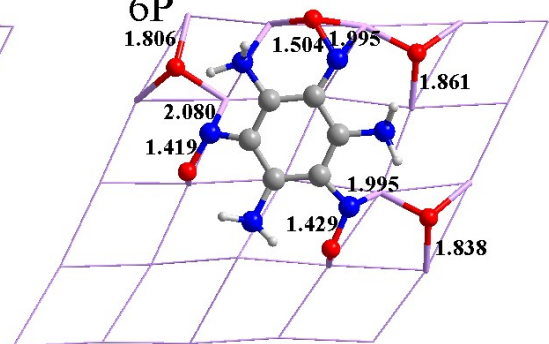

1V

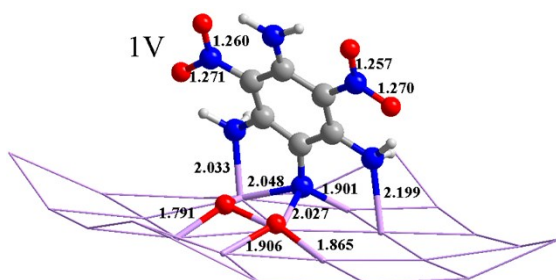

2V

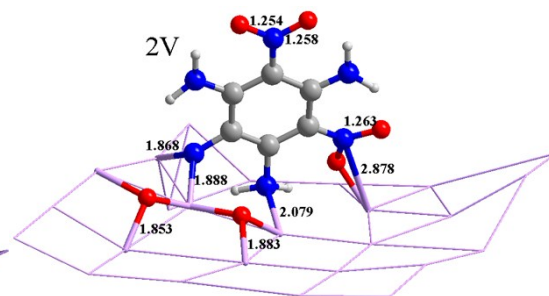

3V

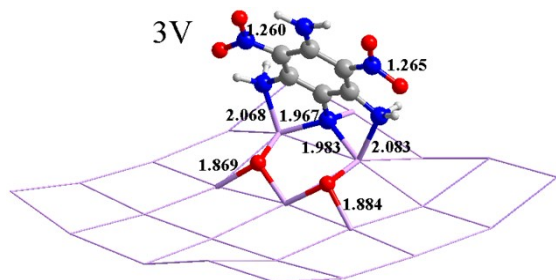

4V

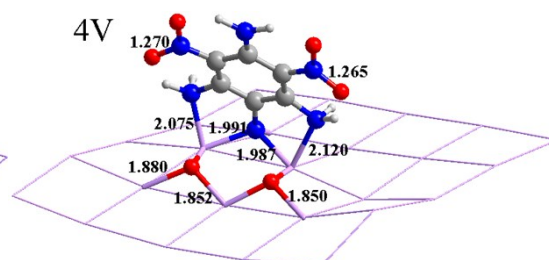

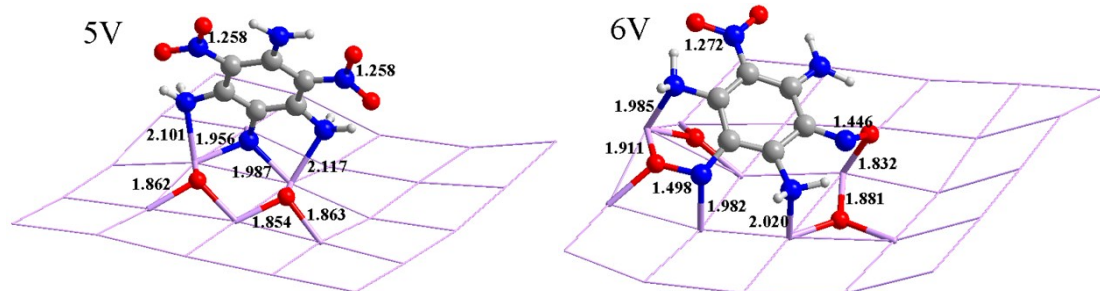

6. Optimized adsorption configurations of TATB/Al (111) marked by Bader charges (unit:  $e$ ): 1P, 2P, 3P, 4P, 5P, and 6P denote the center of the benzene ring above a bridge site between the second layer of Al, a bridge site between the third layer of Al, an fcc site, an on-top site, an hcp site, and a bridge site between the first layer of Al, respectively. 1V, 2V, 3V, 4V, 5V, and 6V denote the C–C symmetric axis of the benzene ring above an on-top site, a bridge site between the second layer of Al, an fcc site, an hcp site, a bridge site between the third layer of Al, and the first layer of Al, respectively. Negative sign means getting electrons.

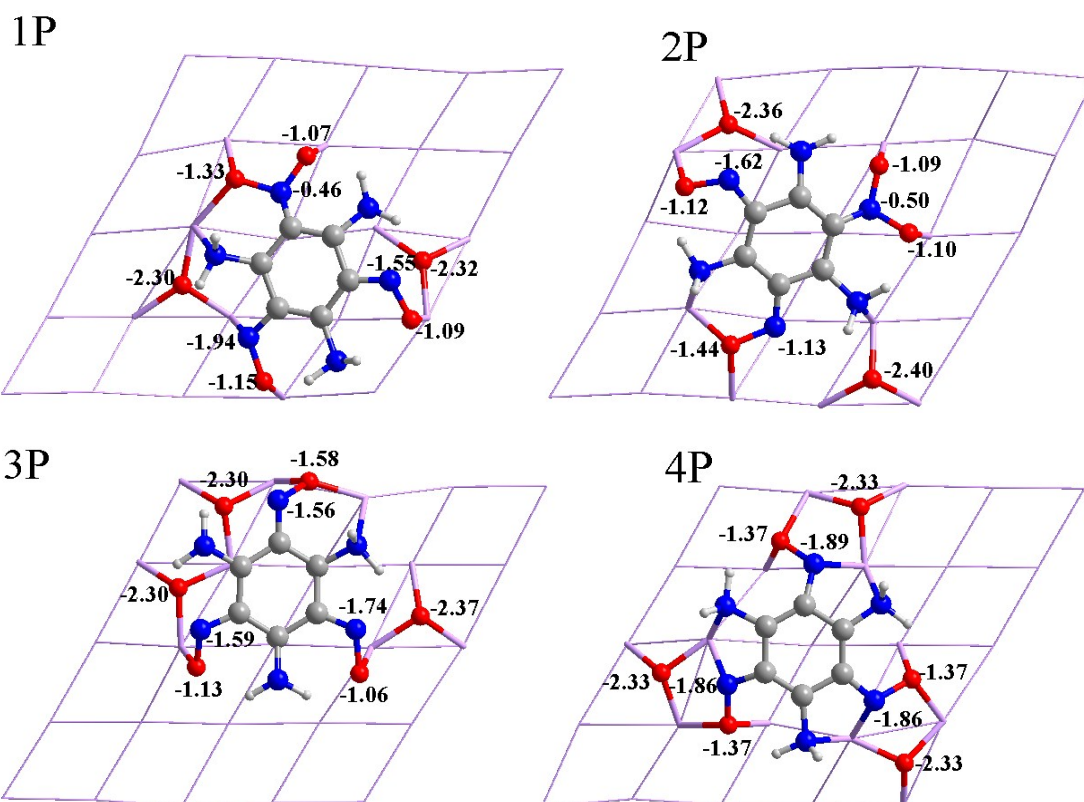

5P

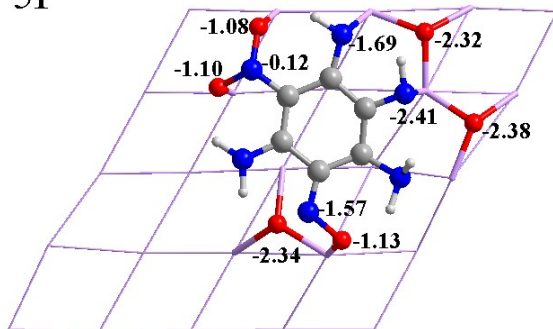

6P

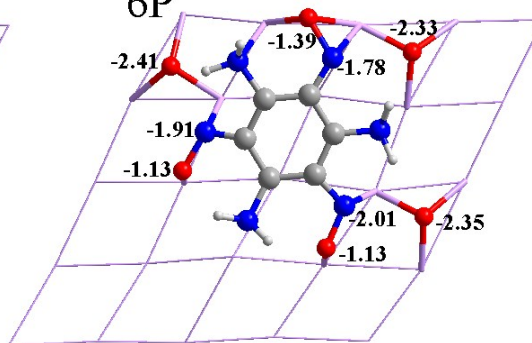

1V

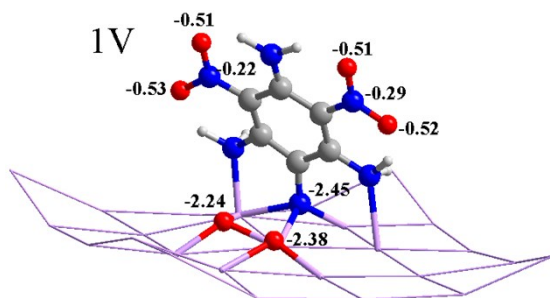

2V

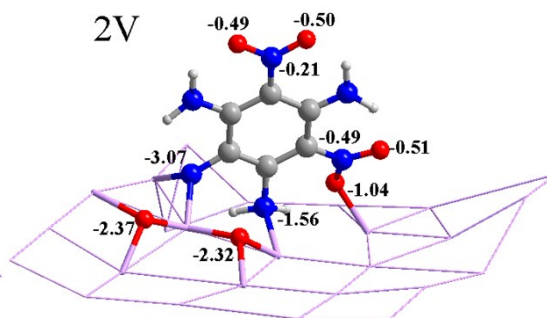

3V

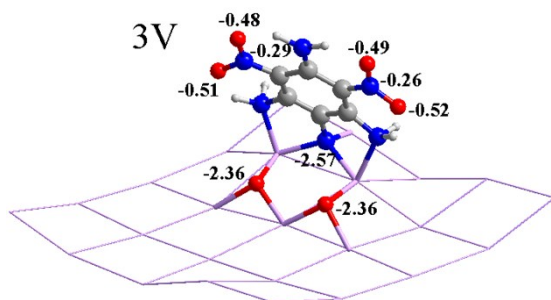

4V

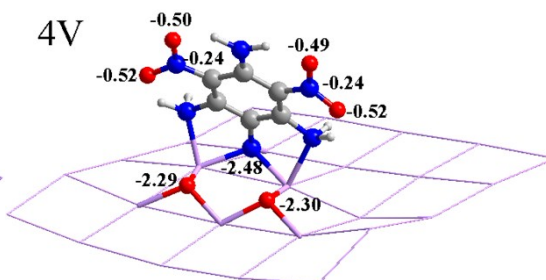

5V

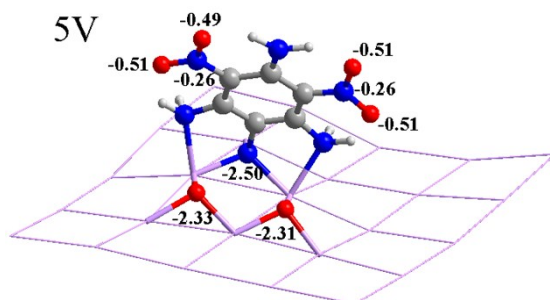

6V

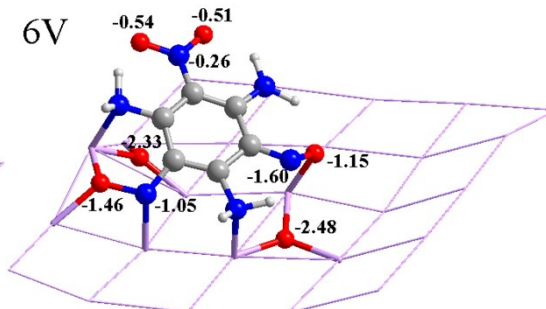

Supplement: c9ra00989b1.pdf [file c9ra00989b1.pdf]
